# Supplementary material for: Facile hydrothermal synthesis of NiS hollow microspheres with mesoporous shells for high-performance supercapacitors
Source: Royal Society of Chemistry journal article supplement (doi:10.1039/c5nj02425k), 2015-12-02
Supplement: c5nj02425k1.pdf [file c5nj02425k1.pdf]

**Electronic Supplementary Information**

**Facile hydrothermal synthesis of NiS hollow  
microspheres with mesoporous shells for high-  
performance supercapacitors**

Zhongchun Li,<sup>ab</sup> Aijun Gu<sup>b</sup>, Jianhua Sun<sup>ab</sup> and Quanfa Zhou<sup>ab</sup>

<sup>a</sup>School of Chemistry and Environmental Engineering, Jiangsu University of  
Technology, Changzhou, 213001, P. R. China

<sup>b</sup>Jiangsu Key Laboratory of Precious Metals Chemistry and Engineering, Changzhou,  
213001, P. R. China

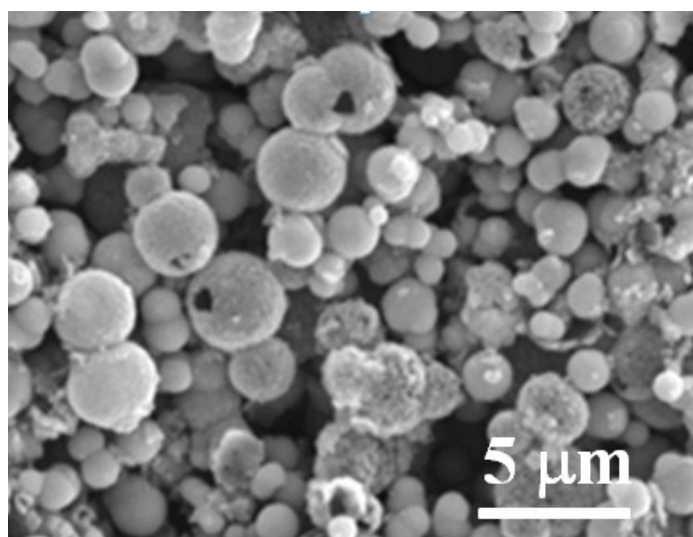

Fig. S1 SEM image of NiS hollow microspheres.
